# Supplementary material
Source: Springer Nature journal article supplement (https://www.springermedizin.de/resource/supplementary/12936_2011_1917_MOESM5_ESM.pdf/9542048)

**Benin**  
N = 844

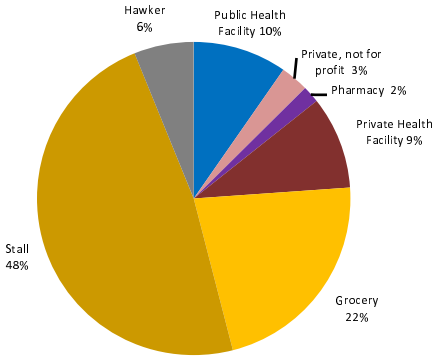

**DRC**  
N = 1,375

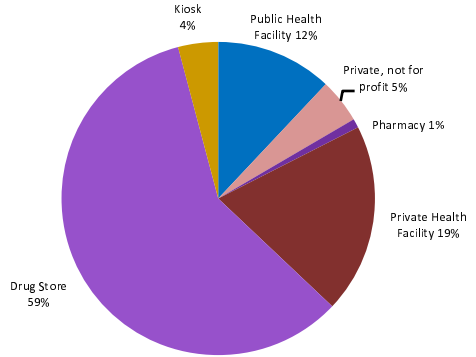

**Madagascar**  
N = 2,414

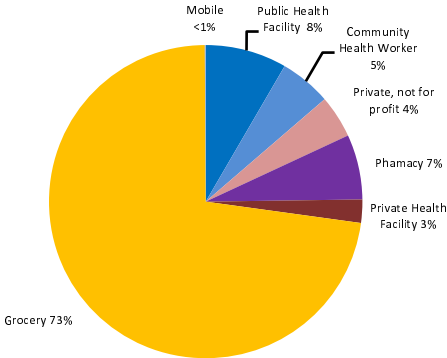

**Nigeria**  
N = 2,113

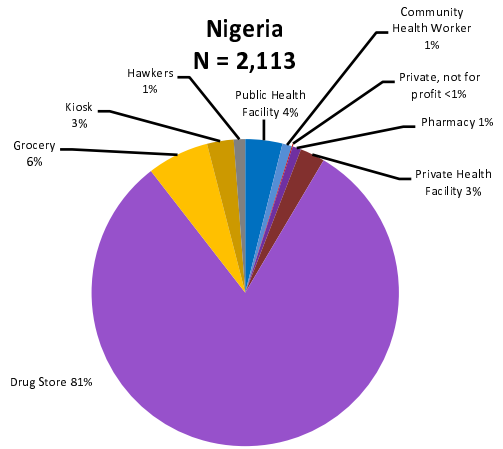

**Uganda**  
N = 1,225

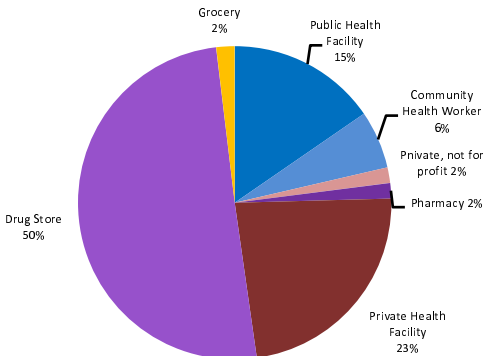

**Zambia**  
N = 435

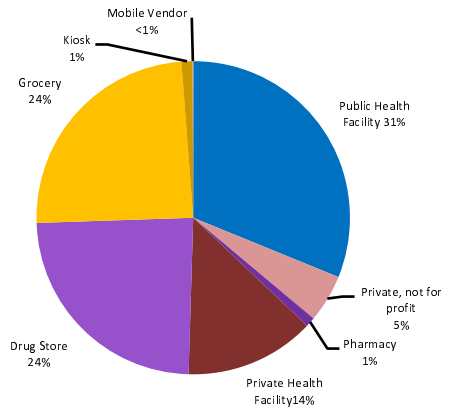

Supplement: MOESM5 [file 9542048]
